1 **Host- and age-dependent transcriptional changes in *Mycobacterium tuberculosis* cell**  
2 **envelope biosynthesis genes after exposure to human alveolar lining fluid**

3 Anna Allué-Guardia<sup>1\*</sup>, Andreu Garcia-Vilanova<sup>1</sup>, Angélica M. Olmo-Fontánz<sup>1,2</sup>, Jay Peters<sup>3</sup>,  
4 Diego J. Maselli<sup>3</sup>, Joanne Turner<sup>4</sup>, Larry S. Schlesinger<sup>4</sup>, and Jordi B. Torrelles<sup>1\*</sup>

5  
6 <sup>1</sup> Population Health Program, Texas Biomedical Research Institute, San Antonio, TX 78227, USA

7 <sup>2</sup> Integrated Biomedical Sciences Program, University of Texas Health Science Center at San  
8 Antonio, TX 78229, USA

9 <sup>3</sup> Division of Pulmonary and Critical Care Medicine, School of Medicine, UT Health San Antonio,  
10 San Antonio, TX 78229, USA

11 <sup>4</sup> Host-Pathogen Interactions Program, Texas Biomedical Research Institute, San Antonio, TX  
12 78227, USA

13

14 \* **Corresponding Authors:** Anna Allué-Guardia, PhD (aallueguardia@txbiomed.org) and Jordi  
15 B. Torrelles, PhD (jtorrelles@txbiomed.org)

16

17 **Running Title:** Human lung mucosa and *M. tuberculosis* infection

18

19 **Keywords:** *Mycobacterium tuberculosis*, alveolar lining fluid (ALF), lung mucosa, cell envelope  
20 biosynthesis, gene expression

21

22

23

24 **Abstract**

25 Tuberculosis (TB) infection, caused by the airborne pathogen *Mycobacterium tuberculosis* (*M.tb*),  
26 resulted in almost 1.4 million deaths in 2019 and the number of deaths is predicted to increase by  
27 20% over the next 5 years due to the COVID-19 pandemic. Upon reaching the alveolar space, *M.tb*  
28 comes in close contact with the lung mucosa before and after its encounter with host alveolar  
29 compartment cells. Our previous studies show that homeostatic innate soluble components of the  
30 alveolar lining fluid (ALF) can quickly alter the cell envelope surface of *M.tb* upon contact,  
31 defining subsequent *M.tb*-host cell interactions and infection outcomes *in vitro* and *in vivo*. We  
32 also demonstrated that ALF from 60+ year old elders (E-ALF) vs. healthy 18- to 45-year-old adults  
33 (A-ALF) is dysfunctional with loss of homeostatic capacity and impaired innate soluble responses  
34 linked to high local oxidative stress. In this study, a targeted transcriptional assay demonstrates  
35 that *M.tb* exposure to human ALF alters the expression of its cell envelope genes. Further, our  
36 results indicate that A-ALF-exposed *M.tb* upregulates cell envelope genes associated with lipid,  
37 carbohydrate, and amino acid metabolism, as well as genes associated with redox homeostasis and  
38 transcriptional regulators. Conversely, *M.tb* exposure to E-ALF shows lesser transcriptional  
39 response, with most of the *M.tb* genes unchanged or downregulated. Overall, this study indicates  
40 that *M.tb* responds and adapts to the lung alveolar environment upon contact, and that the host  
41 ALF status determined by factors such as age might play an important role in determining infection  
42 outcome.

43

44

45

46

## 47 INTRODUCTION

48 *Mycobacterium tuberculosis* (*M.tb*), the causative agent of tuberculosis (TB), is one of the top  
49 leading causes of mortality worldwide due to a single infectious agent, with ~1.4 million attributed  
50 deaths in 2019 [1]. However, global estimates indicate that worldwide disruptions in the healthcare  
51 system during the current COVID-19 pandemic could lead to an additional 6.3 million new TB  
52 cases between 2020 and 2025 and an added 1.4 million more TB deaths [2, 3]. Strict lockdowns  
53 have prevented patients from having access to TB medications and clinical evaluations, and have  
54 led to decreased TB diagnosis rates, since available resources have been redirected to prevent the  
55 spread of COVID-19 [4, 5]. These factors are predicted to cause not only an increase in the number  
56 of TB cases, but also to promote the development of drug-resistant TB, stressing the need for the  
57 development of new anti-TB therapies [6].

58  
59 Most current drugs target the *M.tb* cell envelope, a highly complex and dynamic structure  
60 comprised mainly of carbohydrates and lipids, which provide structural support and resistance to  
61 osmotic changes, as well as a critical immunoregulatory role during *M.tb* infection [7-10]. It  
62 consists of four main layers: 1] an inner plasma membrane with periplasmic space; 2] a  
63 peptidoglycan (PG) core covalently linked to arabinogalactan (AG) and mycolic acids (MAcs); 3]  
64 a peripheral layer of non-covalently linked lipids, glycolipids, and lipoglycans [*e.g.* phthiocerol  
65 dimycocerosates (PDIMs), trehalose dimycolate (TDM) and monomycolate (TMM), sulfolipids  
66 (SLs), phosphatidyl-*myo*-inositol mannosides (PIMs), lipomannan (LM), and mannose-capped  
67 lipoarabinomannan (ManLAM), among others], and; 4) the outermost layer or capsule [11, 12].  
68 The pathogenesis of *M.tb* is inherently linked to its heterogeneous and dynamic cell envelope  
69 surface, and cell envelope remodeling has been observed during infection and in response to

70 environmental stresses [10]. Thus, the particular cell envelope composition of a mycobacterial cell  
71 at a given moment will define *M.tb*-host cell interactions and determine the infection outcome.  
72 However, it remains poorly understood how the *M.tb* cell envelope changes and adapts to the host  
73 lung environment during the natural course of pulmonary infection, a critical gap in our knowledge  
74 for defining new drug targets against *M.tb* relevant to bacteria in the lung environment.

75

76 After the host inhales droplets containing *M.tb*, the airborne pathogen is deposited in the lung  
77 alveolar space. Here it first comes in contact with soluble components of the alveolar lining fluid  
78 (ALF) for an undefined period of time (from minutes to hours/days) [13-16], before and after its  
79 encounter with host alveolar compartment cells such as alveolar macrophages (AMs) or alveolar  
80 epithelial cells (ATs), and immune cells such as neutrophils [17, 18]. Our previous studies have  
81 demonstrated that homeostatic ALF hydrolytic enzymes, whose function is to promote lung health,  
82 can modify the *M.tb* cell envelope without reducing *M.tb* viability [19, 20], including a reduction  
83 in major *M.tb* virulent factors mannose-capped lipoarabinomannan (ManLAM) and trehalose  
84 dimycolate (TDM), from the *M.tb* cell surface. These ALF-derived *M.tb* cell envelope  
85 modifications have an impact on *M.tb* infection outcomes *in vitro* and *in vivo*, since they allow for  
86 a better recognition by cells of the immune system and improved control of the infection [19-23].  
87 Indeed, exposure to ALF results in decreased *M.tb* association and intracellular growth within  
88 human macrophages, as well as altered intracellular trafficking and increased pro-inflammatory  
89 responses [19]. Neutrophils also possess an enhanced innate ability to recognize and kill  
90 intracellular ALF-exposed *M.tb*, while limiting excessive inflammatory responses [21]. *In vivo*  
91 infections using ALF-exposed *M.tb* demonstrate better control of infection in the mouse model  
92 [22]. Further, *M.tb* fragments released after ALF exposure by the action of the ALF hydrolases,

93 are capable of priming neutrophils and modulating macrophages in an IL-10 dependent manner to  
94 contribute further to the control of *M.tb* [20, 23].

95

96 Importantly, the levels and functionality of ALF soluble components are altered in certain human  
97 populations such as the elderly, with increased pro-oxidation and pro-inflammatory pathways,  
98 altered complement and surfactant levels, and decreased binding capability of surfactant protein  
99 A (SP-A) and D (SP-D) in the aging lung, defining what we call ‘dysfunctional ALF’.  
100 Consequently, *M.tb* exposed to elderly dysfunctional ALF, while maintaining its viability, show  
101 increased intracellular growth in macrophages and ATs, as well as increased bacterial burden in  
102 mice with increased lung tissue damage [22, 24, 25]. Altogether, these results indicate that the host  
103 ALF functional status plays a key role in shaping the *M.tb* cell envelope during the initial stages  
104 of infection. However, the overall impact of these different ALF microenvironments on *M.tb*  
105 adaptation to the human host and subsequent infection progression is still largely unknown.

106

107 Since hydrolytic enzymes present in functional human ALF (from healthy adult individuals)  
108 modify the *M.tb* cell envelope [19], we hypothesize that *M.tb* will compensate for these ALF-  
109 driven modifications by altering the expression of genes related to cell envelope biogenesis.  
110 Conversely, *M.tb* exposed to ALF with decreased functionality (such as elderly ALF) will show  
111 little to no changes. In addition, our published data [20, 26] demonstrate that 15-minute exposure  
112 to human ALF is enough to alter the *M.tb* cell envelope and its interactions with host cells and that  
113 these modifications are maintained for up to 24 h [20, 26]. In this study, we first aim to determine  
114 if short (15 min) or long (12 h) exposure to human ALF has any effects on the expression of  
115 targeted *M.tb* cell envelope genes, indicating that gene expression is altered at 15 min and that

116 these changes are maintained up to 12 h. Then, we use a multiplex qPCR assay to compare an  
117 extensive transcriptional profile of *M.tb* cell envelope genes associated with lipid, carbohydrate  
118 and amino acid metabolism, among others, after exposure to functional healthy adult (A)- vs.  
119 dysfunctional healthy elderly (E)-ALF. Our results show significant differences in gene  
120 expression, where A-ALF exposed *M.tb* upregulated genes involved in cell envelope remodeling,  
121 thus implicating this remodeling in subsequent *M.tb*-host interactions during the infection process.

122

123

## 124 **MATERIALS AND METHODS**

125 **Human subjects and ethics statement** - Human ALFs used in this study were previously isolated  
126 from collected bronchoalveolar lavage fluid (BALF) from healthy adult and elderly volunteers, in  
127 strict accordance with the US Code of Federal and approved Local Regulations (The Ohio State  
128 University Human Subjects IRB numbers 2012H0135 & 2008H0119 and Texas Biomedical  
129 Research Institute/UT-Health San Antonio/South Texas Veterans Health Care System Human  
130 Subjects IRB numbers HSC20170667H & HSC20170673H), and Good Clinical Practice as  
131 approved by the National Institutes of Health (NIAID/DMID branch), with written informed  
132 consent from all human subjects. Healthy adults (18-45 years old) and elderly (+60 years) were  
133 recruited from both sexes and no discrimination of race or ethnicity.

134

135 **Collection of BALF and ALF** - BALF was collected from healthy adult or elderly donors in  
136 sterile endotoxin free 0.9% of NaCl, filtered through 0.2 µm filters, and further concentrated 20-  
137 fold using Amicon Ultra Centrifugal Filter Units with a 10-kDa molecular mass cut-off membrane  
138 (Millipore Sigma) at 4°C to obtain ALF with a physiological concentration reported within the

139 human lung (1 mg/mL of phospholipid), as we previously described [19-24, 27]. ALF was  
140 aliquoted in low-protein binding tubes and stored at -80°C until further use.

141

142 **Bacterial cultures and ALF exposure** - *M.tb* strains GFP-Erdman (kindly provided by Dr.  
143 Marcus Horwitz, UCLA) and H<sub>37</sub>R<sub>v</sub> (ATCC# 25618) were cultured in 7H11 agar plates (BD BBL),  
144 supplemented with oleic acid, albumin, dextrose and catalase (OADC) at 37°C for 14 days. Single  
145 bacterial suspensions (~1x10<sup>9</sup> bacteria/ml) were obtained as previously described [19-23].  
146 Bacterial pellets were exposed to individual ALFs (from different donors) for 15 min or ~12 h at  
147 37°C. After exposure, ALF was removed and bacterial pellets were directly incubated in  
148 RNAProtect (Qiagen) for 10 min at room temperature (RT), centrifuged at 13,000 x g and stored  
149 at -80°C until further use. For each of the ALFs, corresponding heat-inactivated ALFs (2 h at 80°C)  
150 [21] were used as controls in parallel.

151

152 **RNA extraction and cDNA synthesis** - RNA from ALF- exposed bacterial pellets was extracted  
153 using the Quick-RNA Fungal/Bacterial Miniprep kit (Zymo Research), following the  
154 manufacturer's protocol. Briefly, bacterial pellets were resuspended in Lysis buffer and transferred  
155 to a ZR BashingBead Lysis tube containing 0.1 mm and 0.5 mm ceramic beads. Bead beating  
156 procedure was performed to break the tough-to-lyse mycobacterial cell envelope in a Disruptor  
157 Genie [10 cycles of 1 min at maximum speed with 1 min intervals on ice]. RNA was isolated from  
158 the supernatant using Zymo-spin columns, including an in-column DNase I treatment, and eluted  
159 in nuclease-free water. To completely remove the genomic DNA, a second DNase treatment was  
160 performed on the isolated RNA using TURBO DNase reagent (Thermo Fisher Scientific) for 30  
161 min at 37°C. Final RNA concentration and quality were measured with a Qubit 4 Fluorometer

162 using the HS RNA kit (Thermo Fisher Scientific), and a Nanodrop One<sup>C</sup>, respectively. RNA (500  
163 ng) was used for the synthesis of cDNA using the RevertAid H Minus First Strand cDNA Synthesis  
164 kit (Thermo Fisher Scientific) with random hexamer primers, following the manufacturer's  
165 guidelines.

166

167 **qPCR analysis of targeted genes** - Real-time quantitative PCR (qPCR) was performed to measure  
168 the expression of ten genes associated with the *M.tb* cell wall biosynthesis pathways (*pmmA*,  
169 *manB*, *whiB2*, *pimA*, *pimB*, *pimF*, *embC*, *pmmB*, *pmmI*, *manA*) after exposure of *M.tb* H<sub>37</sub>R<sub>v</sub> to  
170 healthy human ALF (n=2 biological replicates, from two different donors). cDNA and primers  
171 were used in a 20 µl qPCR reaction with PowerUp SYBR Green Master Mix (Applied  
172 Biosystems), following manufacturer's instructions. Reactions were run in an Applied Biosystems  
173 7500 Real-Time PCR instrument with the following settings: reporter SYBR Green, no quencher,  
174 passive reference dye ROX, standard ramp speed, and continuous melt curve ramp increment.  
175 Expression was calculated relative to housekeeping genes *rpoB* or *sigA* using the  $2^{-\Delta\Delta CT}$  method  
176 [28].

177

178 **High-throughput multiplex qPCR** - Primer pairs for multiplex qPCR assay were designed using  
179 BatchPrimer3 (<https://wheat.pw.usda.gov/demos/BatchPrimer3/>) [29] and PrimerQuest (IDT,  
180 <https://www.idtdna.com/pages/tools/primerquest>), with the following settings: primer size 18-21  
181 ntds, T<sub>m</sub> of ~ 54-60°C, and maximum 3' self-complementarity of 3 ntd. Best primers within these  
182 parameters were selected and aligned to the *M.tb* H<sub>37</sub>R<sub>v</sub> reference genome (Genbank accession  
183 number: NC\_000962.3) [30-32] to confirm that they uniquely aligned to the targeted gene regions.  
184 A high-throughput multiplex qPCR targeting more than 80 genes associated with *M.tb* metabolism



185 and cell wall biogenesis was performed in *M.tb* Erdman exposed to ALF using the Biomark 96.96  
186 Dynamic Array IFC for Gene Expression in a Biomark HD instrument (Fluidigm). Briefly, 1.25  
187  $\mu$ l of cDNA was pre-amplified in a 5  $\mu$ l reaction with our pool of specific primers (500nM) using  
188 the Fluidigm Preamp Master Mix for a total of 10 cycles. Then, a 1/10 dilution of the pre-amplified  
189 cDNA and 100  $\mu$ M of combined forward and reverse primers were used to prepare the sample pre-  
190 mix and assay mix, respectively. The 96.96 IFC chip was loaded and the assay run in a Biomark  
191 HD following the manufacturer's instructions for Gene expression using Delta Gene Assays.  
192 Relative expression for each of the genes was calculated in the Fluidigm Real-Time PCR Analysis  
193 software using the  $2^{-\Delta\Delta CT}$  method with *rpoB* as the reference gene, and reported as the log<sub>2</sub> fold  
194 change of A-ALF (n=3 biological replicates using ALFs from different donors) or E-ALF (n=3  
195 biological replicates using ALFs from different donors) exposed *M.tb* Erdman compared to control  
196 samples (*M.tb* Erdman exposed to corresponding heat-inactivated ALFs). As a control to compare  
197 both methods (Biomark vs. targeted qPCR), we included *M.tb* H<sub>37</sub>R<sub>v</sub> exposed to adult ALF in the  
198 Biomark multiplex qPCR assay.

199

200 **Statistical analysis** - Statistical significance between the two qPCR methods used in this study  
201 was calculated in GraphPad Prism v9.0.1 for each of the genes with a two-way ANOVA using the  
202 Sidak's correction for multiple comparisons test with a 95% confidence interval.

203

204

## 205 **RESULTS**

206 **Exposure to human ALF alters the expression of cell envelope PIMs/LM/ManLAM**  
207 **biosynthesis genes in *M.tb***

208 Our laboratory has previously demonstrated that ALF hydrolases modify the *M.tb* cell envelope,  
209 and that these cell envelope modifications occur in as little as 15 min of *M.tb* being in contact with  
210 ALF and are maintained up to 24 h, without compromising *M.tb* viability [19]. Importantly, these  
211 ALF-driven alterations of the *M.tb* cell envelope had an effect on *M.tb* infection outcomes *in vitro*  
212 and *in vivo* [19-23]. Based on these results, we sought to determine if *M.tb* alters its cell wall  
213 biosynthetic pathways as a direct consequence of ALF exposure. Because one of the main *M.tb*  
214 cell envelope components, ManLAM, is decreased by the action of ALF hydrolases [19] and PIMs,  
215 LM and ManLAM are thought to be part of the same biosynthetic pathway, we first selected a few  
216 key *M.tb* cell envelope genes associated with biosynthesis of initial mannose donors GDP-Man  
217 [*manA/Rv3255c*, *manB/Rv3264c* (previously annotated as *manC*), *pmmA/Rv3257c* (previously  
218 annotated as *manB*), *pmmB/Rv3308*] and polyprenylphosphate-based mannose or PPM  
219 (*pmm1/Rv2051c*), the transcriptional regulator *whiB2/Rv3260c* [33], and mannosyl-  
220 (*pimA/Rv2610c*, *pimB/Rv2188c*, *pimF/Rv1500*) and arabinosyl- (*embC/Rv3793*) transferases (**Fig**  
221 **1** and **Table 1**) [34, 35], all involved in this pathway. Expression was determined by RT-qPCR  
222 from *M.tb* previously exposed to human ALF for 15 min and 12 h. Relative expression was  
223 normalized to housekeeping genes *rpoB* (**Fig 2A**) or *sigA* (**Fig 2B**). *M.tb* preparations exposed to  
224 the same heat-inactivated ALFs were used as reference samples.

225  
226 The majority of targeted *M.tb* cell envelope genes were moderately upregulated after 15 min of  
227 exposure to ALF when compared to *M.tb* exposed to heat-inactivated ALF (depicted as log<sub>2</sub> fold  
228 changes), except for *manA* that was slightly downregulated and *manB* and *pimB* that did not show  
229 any changes (**Fig 2**). Indeed, *ppm1* (polyprenol-monophosphomannose synthase), which transfers  
230 mannose from GDP-mannose to endogenous PPM [36, 37] in the PIMs/LM/ManLAM

231 biosynthesis pathway, showed the highest log<sub>2</sub> fold change (1.84 and 1.89 when using *rpoB* or  
232 *sigA* as reference genes, respectively) after 15 min of exposure compared to heat-inactivated ALF,  
233 although its expression was too low to be detected in our qPCR assay after 12 h (depicted as ND,  
234 **Fig 2**). Similarly, *manA* was below the detection limit at 12 h and expression differences could not  
235 be quantified (ND, **Fig 2**). A few of the tested genes increased their expression at 12 h post-ALF  
236 exposure (*manB*, *pimB*, and *embC*) compared to heat-inactivated ALF, while others showed no  
237 major transcriptional changes or were slightly downregulated.

238

239 When comparing 15 min vs. 12 h post-ALF exposure, some PIMs/LM/ManLAM biosynthesis-  
240 associated genes decreased their expression (*pmmA*, *whiB2*, *pimF*, *pimA*) while others increased  
241 (*manB*, *pimB*, *embC*) (**Fig 2** and **Table 2**). This suggests a temporal and dynamic adaptation of  
242 *M.tb*'s cell envelope components in response to ALF, in agreement with previous reports showing  
243 cell envelope remodeling of *M.tb* during infection and in response to different environmental  
244 conditions [33, 34, 38-43]. *pmmB* expression was too low to be detected by our qPCR assay at  
245 either timepoints tested, thus no log<sub>2</sub> fold changes are shown.

246

#### 247 **Effects of A- vs. E-ALF exposure on the expression of cell envelope biosynthesis genes in *M.tb***

248 Since we observed changes in the expression of key *M.tb* cell envelope genes in response to ALF,  
249 and based on our previous publications showing that ALF status influences *M.tb*-host interactions  
250 via multiple factors, including age [22, 24], we next sought to determine if contact with different  
251 host ALFs would result in different transcriptional profiles of the *M.tb* cell envelope. We exposed  
252 *M.tb* Erdman to individual A-ALFs or E-ALFs for 12 h as described in our previous work [19],  
253 and calculated the relative expression of 83 genes related to cell envelope biosynthesis using a

254 multiplex qPCR assay in a Biomark HD platform [44]. Results from some of the genes were  
255 compared to the previous targeted qPCR assay, showing concordance in gene expression between  
256 the two qPCR methods used in this study (**Supplemental Figure 1**). Small differences observed  
257 could be attributed to inherent variability within human ALF, since we used different human  
258 donors.

259  
260 Genes selected for the multiplex qPCR are related to the biosynthesis of key *M.tb* cell envelope  
261 lipid and carbohydrate components (**Supplemental Table 1**). For lipid metabolism, we targeted  
262 genes from the following pathways: fatty acid metabolism, glycerolipid and glycerophospholipid  
263 metabolism, phosphatidylinositol (PI, precursor for more complex glycolipids such as PIM and  
264 LAM), PIMs/LM/ManLAM biosynthesis, mycolic acid biosynthesis, and linoleic acid metabolism  
265 [9]. For carbohydrate metabolism, we included genes related to: carbohydrate biosynthesis,  
266 glycolysis and gluconeogenesis, mannose and fructose metabolism, galactose metabolism, citrate  
267 cycle or TCA, glyoxylate and dicarboxylate metabolism, and inositol phosphate metabolism [45].  
268 Gene names, with corresponding function, pathway and functional categories, as well as primer  
269 sequences are listed in **Supplemental Table 1**.

270  
271 As shown in **Fig 3A**, most of the cell envelope genes associated with lipid metabolism from the  
272 different *M.tb*-targeted pathways were significantly upregulated in *M.tb* exposed to A-ALFs (A<sub>1</sub>  
273 to A<sub>3</sub>, three different adult donors) when compared to the same *M.tb* strain exposed to E-ALFs (E<sub>1</sub>  
274 to E<sub>3</sub>, three different elderly donors), with A<sub>1</sub>-ALF having the highest log<sub>2</sub> fold changes (**Fig 3A**  
275 and **Supplemental Table 2**). Only a few genes were downregulated in *M.tb* exposed to A-ALFs,  
276 including *fabH* and *fadD25* (FA metabolism, the latter involved in lipid degradation), and *adhE1*,

277 *glpK*, and *cdsA* (glycerolipid and glycerophospholipid synthesis). ATP-binding cassette  
278 transporter Rv1747, thought to be involved in the export of lipooligosaccharides (LOS) through  
279 the mycobacterial membrane, was also downregulated in A-ALF-exposed *M.tb*, whereas negative  
280 regulator of Rv1747, named Rv2623 [46], showed increased expression (**Fig. 3A**). Interestingly,  
281 *M.tb* exposed to two of the E-ALFs showed upregulation of Rv1747 (**Fig. 3A**), contrary to A-ALF  
282 exposure, indicating a potential increase in *M.tb* PIM export after exposure to elderly ALF. All  
283 genes involved in mycolic acid synthesis tested in this study were upregulated in *M.tb* exposed to  
284 A-ALF. Finally, exposure to E-ALFs showed lesser effects on the overall expression of *M.tb* lipid  
285 metabolism when compared to A-ALFs, with several genes showing moderate upregulation  
286 (especially in E<sub>1</sub>-ALF, which showed the highest upregulation among the elders for most of the  
287 genes), and others with no effects or even decreased expression (**Fig. 3A**).

288  
289 A similar trend was observed for carbohydrate metabolism genes (**Fig. 3B**), where most of the  
290 genes from the different pathways studied showed significant increased expression in *M.tb*  
291 exposed to A-ALFs when compared to E-ALFs. Particularly, 8 out of 12 genes associated with  
292 fructose metabolism and the mannose donor (GDP-Man/PPM) biosynthesis pathways were highly  
293 expressed in A-ALF-exposed *M.tb*, with only 2 genes downregulated (*pmmA*, which converts D-  
294 mannose 1-phosphate in D-mannose 6-phosphate, and *pfkA*, also a key enzyme involved in  
295 glycolysis) [47], and 2 other genes with variable expression across different A-ALF-exposed *M.tb*  
296 (*ppm1* and *fbA*) (**Fig 3B**). Galactose metabolism genes (*galK*, *galT*, *galU*, and *aglA*) essential for  
297 the biosynthesis of the cell envelope galactan core [48], were also upregulated after exposure to  
298 A-ALFs, while no changes or even decreased expression were observed in *M.tb* exposed to E-  
299 ALFs. Interestingly, predicted alpha-glucosidase *aglA* was significantly increased after exposure

300 to E<sub>3</sub>-ALF (**Fig 3B**). Further, all tricarboxylic acid cycle (TCA)-associated genes were upregulated  
301 by A-ALF exposure, with the exception of *sdhC* (membrane-anchored subunit of Sdh2, implicated  
302 in *M.tb* growth linked to the TCA cycle under hypoxia conditions) [49] that was downregulated  
303 upon both A- and E-ALF *M.tb* contact. Glyoxylate and dicarboxylate genes were decreased in E-  
304 ALFs when compared to A-ALFs-exposed *M.tb*, whereas the only inositol phosphate gene tested  
305 *ino1*, catalyzing the first step in inositol synthesis for the production of major thiols and cell wall  
306 lipoglycans [50], had decreased expression after *M.tb* exposure to all ALFs tested, except for E<sub>2</sub>-  
307 ALF (**Fig 3B**).

308  
309 In addition to lipid and carbohydrate pathways, we studied genes belonging to other categories  
310 such as amino acid metabolism, redox homeostasis, and transcriptional regulators (**Fig. 3C** and  
311 **Supplemental Table 1**). Results indicate that *M.tb* exposed to A-ALFs have major transcriptional  
312 changes compared to *M.tb* exposed to E-ALFs. Indeed, all genes associated with amino acid  
313 metabolism were highly upregulated in *M.tb* exposed to A-ALFs, except for *serC* (serine  
314 metabolism, **Fig 3C**) [51]. Other cell wall-associated genes were upregulated in *M.tb* exposed to  
315 A-ALFs including the putative membrane protein EccB3, part of the ESX-3 secretion system,  
316 important for zinc and iron uptake and homeostasis [52], and the cutinase precursor Cfp21, a  
317 lipolytic enzyme with immunogenic properties shown to elicit T and B cell responses [53, 54].  
318 Similarly, genes *ahpC* and *sodC*, involved in the oxidative stress response [55, 56], and  
319 transcriptional regulators *dosR* and *phoP* had significantly increased expression in *M.tb* exposed  
320 to A-ALFs, whereas *virS* [57] was not significantly increased. Overall, our results demonstrate that  
321 exposure to functional A-ALF results in broad changes in *M.tb* cell envelope biosynthesis,  
322 suggesting highly dynamic cell envelope changes with constant remodeling within the lung

323 alveolar environment, whereas *M.tb* exposed to dysfunctional E-ALF [22, 24, 25] showed more  
324 limited effects.

325

326

## 327 **DISCUSSION**

328 The cell envelope of *M.tb* is mainly composed of lipids and carbohydrates, and constitutes a  
329 dynamic structure known to adapt to the changing local host environment, especially during  
330 different stages of infection [8, 10]. Human ALF contains hydrolases whose homeostatic function  
331 is to maintain lung health. We have demonstrated that healthy adult individuals have up to 17  
332 hydrolase activities capable of altering the *M.tb* cell wall. Indeed, exposure of *M.tb* to these adult  
333 ALFs significantly alters the *M.tb* cell wall reducing the content of two major cell envelope  
334 components, ManLAM and TDM, without compromising *M.tb* viability [19]. Importantly, these  
335 hydrolase activities are decreased in ALFs from healthy elders [24]. Thus, here, we demonstrate  
336 for the first time that exposure to human ALF, the first environment encountered by *M.tb* upon  
337 infection, results in transcriptional changes in key *M.tb* cell envelope biogenesis genes. Further,  
338 exposure to healthy A-ALFs resulted in increased expression of most of the *M.tb* cell envelope-  
339 associated genes from lipid, carbohydrate and amino acid metabolic pathways, among others. In  
340 contrast, *M.tb* exposed to E-ALFs from healthy elderly donors, which we demonstrated constitutes  
341 a more oxidized, pro-inflammatory and dysfunctional environment [22, 24], did not show many  
342 significant changes in gene expression.

343

344 We first assessed essential genes from the PIMs/LM/ManLAM synthesis and the mannose  
345 metabolism pathway (carbohydrate metabolism) (**Figs 1 and 2**), since our previous studies showed

346 a decrease of ManLAM in the cell envelope of *M.tb* after ALF exposure [19]. PIM/LM/ManLAM  
347 molecules are essential to regulate *M.tb* recognition, uptake, survival and modulate the host  
348 immune response [58, 59]. Indeed, ManLAM has been shown to block phagosome-lysosome (P-  
349 L) fusion by inhibiting the Ca<sup>2+</sup>/Calmodulin phosphatidylinositol-3-kinase (PI3K) hvps34  
350 pathway, promoting *M.tb* intracellular survival [60-62]. The biosynthesis of these molecules  
351 depends on mannose donors such as GPD-Man and PPM. Previous studies suggest that mannose  
352 donor levels are altered during the course of the infection. Indeed, *M.tb* mannose donor  
353 biosynthesis genes had increased expression levels 2 h after macrophage infection and then  
354 gradually decreased [33]. These were also found upregulated in an *in vitro* granuloma model [34].  
355

356 In our study, most of the genes involved in the PIM/LM/ManLAM biosynthesis pathway were  
357 upregulated after exposure to A-ALFs (**Figs 3A and 3B**). We speculate that *M.tb* is trying to  
358 compensate for the loss of ManLAM and other mannose-containing cell envelope surface  
359 components due to the action of A-ALF hydrolases [19], with major implications for disease  
360 progression. In this regard, bacilli exposed to functional A-ALF might get taken up by antigen-  
361 presenting cells (APCs) before they can reconstitute ManLAM and will be cleared, while bacilli  
362 that rapidly upregulate and replenish ManLAM on the cell surface before its encounter with APCs  
363 will be able to block P-L fusion and survive within the host cells. Conversely, exposure to E-  
364 ALFs did not have major transcriptional effects in genes from both mannose donors and  
365 PIM/LM/ManLAM biosynthesis pathways (**Figs 3A and 3B**), likely because E-ALF have less  
366 hydrolase activities [24]. This E-ALF deficiency in hydrolase activities could be directly linked to  
367 E-ALF being a highly oxidative environment [22, 24], therefore impacting the *M.tb* cell envelope  
368 and subsequent remodeling to a much lesser degree during infection. Since removal of surface



369 lipids in *M.tb* enhances trafficking to acidic compartments [61], fewer ALF-driven alterations after  
370 E-ALF exposure might partially explain why *M.tb* replicates faster in the elderly lung environment  
371 by residing in its protective intracellular niche [22, 25]. Further studies will be necessary to  
372 determine the specific impact of elderly ALF hydrolases on the *M.tb* cell envelope.

373

374 Most lipid metabolism genes associated with mycolic acid synthesis, fatty acid metabolism,  
375 glycerolipid and glycerophospholipid synthesis, and linoleic acid metabolism were also  
376 significantly upregulated in A-ALF compared to E-ALF-exposed *M.tb* (**Fig 3A**). A similar trend  
377 was observed for carbohydrate metabolism, amino acid metabolism, and genes involved in redox  
378 homeostasis, stress response, and transcriptional regulation (**Figs 3B and 3C**). Nitrogen and amino  
379 acid metabolism are important for *M.tb* pathogenesis and host colonization during infection, where  
380 intracellular bacteria exploit host nitrogen sources for growth and replication [63, 64]. Importantly,  
381 amino acids acquired from the host such as Ala and Gly might be directly assimilated for the  
382 synthesis of cell wall biomass and incorporated into the PG layer [65-67]. Transcriptional  
383 regulators DosR and PhoP also showed increased expression upon contact with functional A-ALF.  
384 These proteins are part of two-component systems implicated in a large number of *M.tb* adaptive  
385 responses, such as low oxygen levels during dormancy and persistence in the granuloma  
386 environment [68, 69], but they also play key roles as regulators of *M.tb* virulence [70, 71].  
387 Interestingly, DosR has been shown to play a role in lipid accumulation during oxidative stress  
388 and iron starvation in certain *M.tb* clinical strains [72, 73].

389

390 These results indicate that the *M.tb* response to the ALF environment is not only limited to *M.tb*  
391 cell envelope remodeling, but also potentially affects overall *M.tb* metabolism and virulence [19-

392 25, 27], with major implications in infection progression and TB disease outcome. Further global  
393 transcriptomic studies will be able to provide clues as to which other metabolic pathways are  
394 altered by the human ALF environment, with the potential to decipher key upregulated bacterial  
395 determinants during early stages of infection that can be targeted for the development of new  
396 preventative and therapeutic strategies [74]. Indeed, *M.tb* is exposed to ALF during the first  
397 infection stages upon deposition to the alveolar space, but also when escaping from necrotic cells  
398 or in cavities during active TB episodes leading to transmission [17]. Thus, it is plausible that *M.tb*  
399 adapts its cell envelope to the alveolar environment, upregulating the expression of specific genes  
400 to compensate the changes generated upon contact with ALF hydrolases and thus, determining  
401 interactions with host cells. In this regard, timing is expected to be important, as *M.tb* bacilli not  
402 able to restore its cell wall constitution before encountering antigen presenting cells such as  
403 alveolar macrophages might be cleared [19-21].

404

405 Key genes such as Rv1747, thought to participate in the export of PIMs to the cell envelope through  
406 negative regulation by stress protein Rv2623 [46], were highly downregulated in *M.tb* exposed to  
407 A-ALFs. Indeed, an  $\Delta$ Rv1747 mutant showed decreased levels of PIMs and was growth-  
408 attenuated, while  $\Delta$ Rv2623 had enhanced PIM expression and was hypervirulent in mice [75, 76].  
409 Our data suggest that contact with functional A-ALF reduces the expression of PIM transporter  
410 Rv1747 through increased expression of Rv2623, modulating the export of immunomodulatory  
411 PIMs and potentially influencing bacterial growth and virulence.

412

413 Taken together, these results suggest that *M.tb* compensates for the loss of cell surface components  
414 (due to the action of ALF hydrolases) by upregulating and activating different cell envelope

415 biosynthesis pathways to rebuild its cell wall, at the detriment of downregulating some key genes  
416 (e.g. Rv1747) involved in the transport of cell envelope components to the surface [19-21, 23, 46].  
417 This shift between ALF innate homeostatic mechanisms and *M.tb* countermeasures in the ALF  
418 microenvironment, dependent on the host ALF status (A-AF vs. E-ALF), will likely determine  
419 subsequent interactions between *M.tb* and host cells, as well as intracellular trafficking and  
420 infection outcomes [19-21]. Further studies are needed to provide better insight to why E-ALF-  
421 exposed *M.tb* replicates faster than A-ALF-exposed *M.tb* in both professional and non-professional  
422 phagocytes, and to explain why E-ALF status in old age enhances *M.tb* infection *in vitro* and *in*  
423 *vivo* [22, 24, 25] and contributes to elders being more susceptible to respiratory infections in  
424 general. Finally, it is important to consider that the cell envelope composition of *M.tb* is strain-  
425 specific, with differences observed in *M.tb* strains from different lineages, and thus, different ALF-  
426 driven alterations in *M.tb* metabolism may drive different infection progression [77].

427

428 In summary, our study provides evidence that *M.tb* contact within the ALF shapes the composition  
429 of its cell envelope which, depending on the ALF status ('functional A-ALF' vs. 'dysfunctional E-  
430 ALF') [22, 24, 25], is likely to define subsequent *M.tb*-host cell interactions. Indeed, E-ALF-  
431 exposed *M.tb* presented minimal transcriptional changes when compared to A-ALF-exposed *M.tb*,  
432 which we speculate provides a fitness advantage to *M.tb* as its cell wall remains intact, and thus, it  
433 has the energy reserves required to efficiently infect and replicate faster within host cells of elderly  
434 individuals. In contrast, *M.tb* undergoes significant alterations on its cell wall (significant loss of  
435 virulent factors ManLAM and TDM, among others) upon exposure to A-ALF [19]. This triggers  
436 a greater transcriptional change that we interpret as efforts of A-ALF-exposed *M.tb* to reprogram  
437 its metabolism to quickly rebuild its cell wall, specifically upregulating genes involved in the

438 biosynthesis of *M.tb* virulent factors such as ManLAM, with the ensuing energy requirements.  
439 This can be detrimental for A-ALF-exposed *M.tb* and favor host cells to control infection better in  
440 adult individuals. Future studies will investigate the metabolic status of E-ALF-exposed *M.tb* after  
441 infection of professional and non-professional phagocytes *in vitro* and *in vivo*, and will correlate  
442 bacterial and host determinants associated with increased susceptibility to infection in old age.

443

444

#### 445 **CONFLICT OF INTEREST**

446 The authors declare no conflict of interest.

447

#### 448 **AUTHORS CONTRIBUTIONS**

449 AAG performed experiments and analyzed data. AGV analyzed data. AOF processed BAL  
450 samples. JP and DJM performed the bronchoalveolar lavage procedures in humans. AAG and JBT  
451 conceptually developed the study and wrote the manuscript. JT and LSS provided critical analysis  
452 of the data and editing of the manuscript. JT, LSS, and JBT provided funding. All authors read and  
453 approved the final version of this manuscript.

454

#### 455 **FUNDING**

456 This study was supported by the National Institute on Aging (NIA) of the National Institutes of  
457 Health (NIH) under Award Number P01AG051428 to JT, LSS, and JBT. JBT was partially  
458 supported by the Robert J. Kleberg, Jr. and Helen C. Kleberg Foundation. The content is solely  
459 the responsibility of the authors and does not necessarily represent the official views of the  
460 National Institutes of Health.

461

462 **ACKNOWLEDGEMENTS**

463 We want to thank Sean Vargas from the University of Texas San Antonio (UTSA) Genomics Core  
 464 for his assistance with the multiplex qPCR assay (Biomark HD).

465

466 **TABLES**

467 **Table 1. List of primers targeting the PIMs/LM/ManLAM biosynthesis pathways in *M.tb*.**

| Locus tag<br>H <sub>37</sub> R <sub>v</sub> | Gene<br>name            | Product and Function                                                                                         | Primer sequence (5' to 3')    | T <sub>m</sub> (°C) | Ref. |
|---------------------------------------------|-------------------------|--------------------------------------------------------------------------------------------------------------|-------------------------------|---------------------|------|
| Rv0667                                      | <i>rpoB</i>             | Reference gene                                                                                               | rpoB-F: CCTGGAAGAGGTGCTCTACG  | 60                  | [33] |
|                                             |                         |                                                                                                              | rpoB-R: GGGAAGTCACCCATGAACAC  | 60                  | [33] |
| Rv2703                                      | <i>sigA</i>             | Reference gene                                                                                               | sigA-F: CTCGGTTCGCGCTACCTCA   | 68                  | [35] |
|                                             |                         |                                                                                                              | sigA-R: GCGCTCGCTAAGCTCGGTCA  | 68                  | [35] |
| Rv3255c                                     | <i>manA</i>             | mannose-6-phosphate<br>isomerase / GDP-Man<br>biosynthesis: formation of<br>Man-6-P                          | manA-F: GTTCACCACCTGGATTACCG  | 60                  | [33] |
|                                             |                         |                                                                                                              | manA-R: AACCCCTCGGTGCATAACAAG | 60                  | [34] |
| Rv3264c                                     | <i>manB<sup>a</sup></i> | D-alpha-D-mannose-1-<br>phosphate<br>guanylyltransferase / GDP-<br>Man biosynthesis:<br>formation of GDP-Man | manB-F: ACATCGCCGTTAAACACCAT  | 60                  | [34] |
|                                             |                         |                                                                                                              | manB-R: GTTCCTCACCCATCTGCTGT  | 60                  | [34] |
| Rv3257c                                     | <i>pmmA<sup>b</sup></i> | phosphomannose mutase /<br>GDP-Man biosynthesis:<br>formation of Man-1-P                                     | pmmA-F: GATCACGTTGTGGATGATGG  | 60                  | [33] |
|                                             |                         |                                                                                                              | pmmA-R: GTGGATCTGCAGGCCTATGT  | 60                  | [34] |
| Rv3308                                      | <i>pmmB</i>             | phosphomannose mutase /<br>GDP-Man biosynthesis:<br>formation of Man-1-P                                     | pmmB-F: ATACAGATCACGGCGTCACA  | 60                  | [34] |
|                                             |                         |                                                                                                              | pmmB-R: CGCTGGATATAACGGTCGAT  | 60                  | [34] |
| Rv2051c                                     | <i>ppm1</i>             | Polyprenol-<br>monophosphomannose<br>synthase / PPM<br>biosynthesis                                          | pmm1-F: TGGTTGAAGTCGATCCTTCC  | 60                  | [33] |
|                                             |                         |                                                                                                              | pmm1-R: GCGAACAAGACCAGGCATATG | 63                  | [33] |
| Rv3260c                                     | <i>whiB2</i>            | Transcript. regulatory<br>protein                                                                            | whiB2-F: CCATTTCGAGGAACCTCTGC | 61                  | [33] |
|                                             |                         |                                                                                                              | whiB2-R: CAGGGCGTACTCCAGACACT | 60                  | [33] |
| Rv2610c                                     | <i>pimA</i>             | alpha-(1-2)-<br>phosphatidylinositol<br>mannosyl-transferase / PIM<br>biosynthesis (1 <sup>st</sup> step)    | pimA-F: CCGCACTGCCTGATTACTTT  | 60                  | [34] |
|                                             |                         |                                                                                                              | pimA-R: CGGCTCGTGTAGATGCAGTA  | 60                  | [34] |

|         |             |                                                                                                  |                              |    |      |
|---------|-------------|--------------------------------------------------------------------------------------------------|------------------------------|----|------|
| Rv2188c | <i>pimB</i> | alpha-(1-6)-phosphatidylinositol mannosyl- transferase / PIM biosynthesis (2 <sup>nd</sup> step) | pimB-F: CTCGGTGGTCAAGTACTCG  | 61 | [34] |
|         |             |                                                                                                  | pimB-R: GTGGTCACCTTTGGGAACAT | 60 | [34] |
| Rv1500  | <i>pimF</i> | glycosyltransferase / LM/ManLAM biosynthesis                                                     | pimF-F: CGCCGACGTAGTATTTGGTT | 60 | [34] |
|         |             |                                                                                                  | pimF-R: TGCGTACATAGTCGGCTGTC | 60 | [34] |
| Rv3793  | <i>embC</i> | Arabynosyl-tranferase / ManLAM biosynthesis                                                      | embC-F: ATCACCGAGCTGCTGATG   | 58 | [35] |
|         |             |                                                                                                  | embC-R: TGCGAGTCACCGTTCCTA   | 59 | [35] |

468 <sup>a</sup> Previously annotated as *manC*.

469 <sup>b</sup> Previously annotated as *manB*.

470

471 **Table 2. Comparison of log<sub>2</sub> FC between 15 min and 12 h of ALF exposure for targeted qPCR**

472 **genes.** Differences in the expression of targeted *M.tb* cell envelope genes between 15 min and 12

473 h after ALF exposure were calculated (log<sub>2</sub> FC at 12 h – log<sub>2</sub> FC at 15 min) for each reference

474 gene. Average differences for *rpoB* and *sigA* are also shown.

| Genes        | 15 min vs. 12 h ( <i>rpoB</i> ) | 15 min vs. 12 h ( <i>sigA</i> ) | Mean <i>rpoB</i> and <i>sigA</i> |
|--------------|---------------------------------|---------------------------------|----------------------------------|
| <i>manB</i>  | 0.107                           | 0.425                           | 0.266                            |
| <i>pmmA</i>  | -0.580                          | -0.421                          | -0.500                           |
| <i>whiB2</i> | -0.461                          | -0.276                          | -0.368                           |
| <i>pimA</i>  | -0.418                          | -0.224                          | -0.321                           |
| <i>pimB</i>  | -0.019                          | 0.252                           | 0.116                            |
| <i>pimF</i>  | -0.552                          | -0.406                          | -0.479                           |
| <i>embC</i>  | -0.024                          | 0.222                           | 0.099                            |

475

476

## 477 FIGURE LEGENDS

478 **Fig 1. *M.tb* GDP-Man, PPM and PIM/LM/ManLAM biosynthetic pathways.** GDP-Man can

479 be biosynthesized directly from gluconeogenesis, through formation of Fruc-6-P from Glc-6-P (by

480 the action of Glc-6-P isomerase), formation of Man-6-P (by the action of Man-6-P isomerase or

481 ManA/Rv3255c), formation of Man-1-P (by the action of phosphomutases PmmA/Rv3257c,

482 previously annotated as ManB, and PmmB/Rv3308), and finally formation of GDP-Man (by the

483 action of Man-1-P guanyln-transferase or ManB/Rv3264c, previously annotated as ManC).

484 Further, Man-6-P can also be directly formed from Man by the action of a hexokinase (HK). PPM  
485 is formed from GDP-Man by the action of polyprenyl monophosphomannose synthase or  
486 Ppm1/Ppm2). Further, CDP-DAG together with inositol by the action of PI synthase (Rv2612c)  
487 forms PI, which is further mannosylated by several mannosyltransferases (PimA to PimF) to  
488 generate higher orders PIMs using GDP-Man and PPM as mannose donors. At one point, from  
489 PIM<sub>4</sub> and using PPM as the major mannose donor, PIM<sub>4</sub> is heavily mannosylated by an undisclosed  
490 number of mannosyl-transferases generating LM, and further arabinosylated with arabinosyl-  
491 transferases generating LAM, which can be further mannose-capped by the mannosyl-transferases  
492 action. LAM can also contain methylthio-D-xylose (MTX) capping motifs [78, 79], where MtxT  
493 (Rv0541c) transfers MTX to the mannoside caps of LAM [80]. Note: For simplicity,  
494 acyltransferases (*e.g.* Rv2610c) are not depicted, and neither is the formation of MTX-P-C50 by  
495 MtxS (Rv0539).

496

497 **Fig 2. Relative expression of selected PIM/LM/ManLAM biosynthesis genes in *M.tb* H<sub>37</sub>R<sub>v</sub>**  
498 **after exposure to ALF.** *M.tb* was exposed for 15 min and 12 h to healthy human ALF (n=2  
499 biological replicates, from two independent ALF donors), using *rpoB* (A) or *sigA* (B) as reference  
500 genes. Expression values are shown as log<sub>2</sub> fold changes, and were calculated using the 2<sup>-ΔΔCT</sup>  
501 method (ALF-exposed *M.tb* vs. heat-inactivated ALF-exposed *M.tb*) and plotted as the mean ±  
502 SEM using Prism v9. ND: not detected (below limit of detection).

503

504 **Fig 3. Relative expression of cell envelope biogenesis and metabolism genes in *M.tb* Erdman**  
505 **exposed to A-ALF and E-ALF.** Heatmap showing relative expression of cell wall genes  
506 associated to (A) lipid metabolism; (B) carbohydrate metabolism; and (C) other pathways, in *M.tb*

507 after being exposed to A-ALFs (n=3 biological replicates, A<sub>1</sub>- to A<sub>3</sub>-ALFs), or to E-ALFs (n=3  
508 biological replicates, E<sub>1</sub>- to E<sub>3</sub>-ALFs). Expression was normalized using *rpoB* as reference gene  
509 and calculated using the  $2^{-\Delta\Delta CT}$  method (ALF-exposed *M.tb* vs. heat-inactivated ALF-exposed  
510 *M.tb*). Heatmap was constructed using Prism v9, with downregulated genes in blue (0 to 1 log<sub>2</sub>  
511 fold changes) and upregulated genes in yellow (1 to 5 or more log<sub>2</sub> fold changes). Genes are  
512 grouped based on their assigned pathways (see **Supplemental Table 1**). Note that genes *pimB*,  
513 *accD3*, *adhC* (lipid metabolism), *pmmB*, Rv0794c (carbohydrate metabolism), and *metZ* (others)  
514 were below the limit of detection in one or more of the samples, and have not been included in the  
515 heatmaps.

516

517

518

519

520

521

522

523

524

525

526

527

528

529

530

531

532

533

534





Fig 2

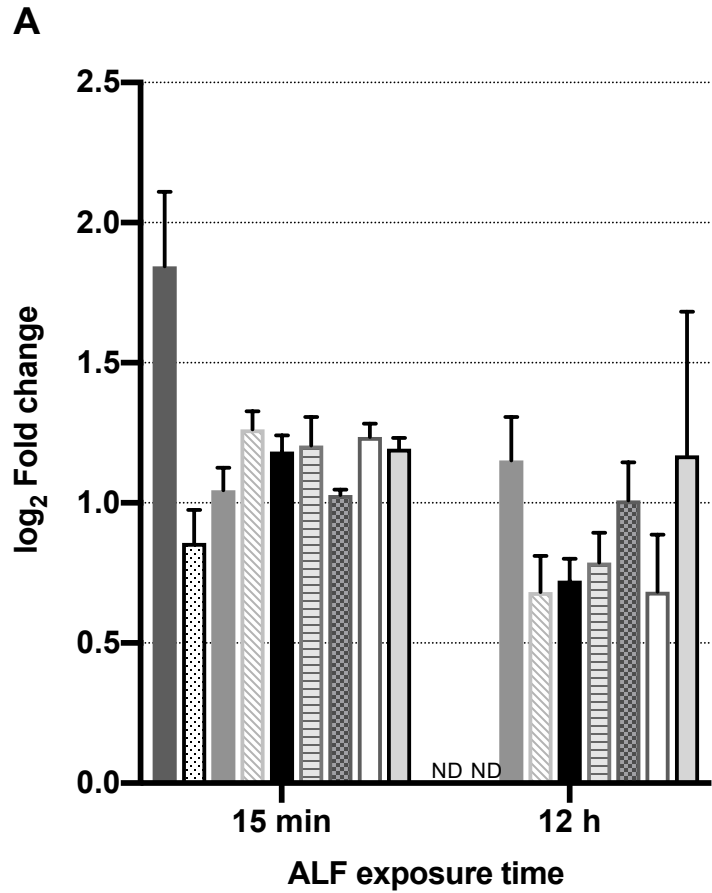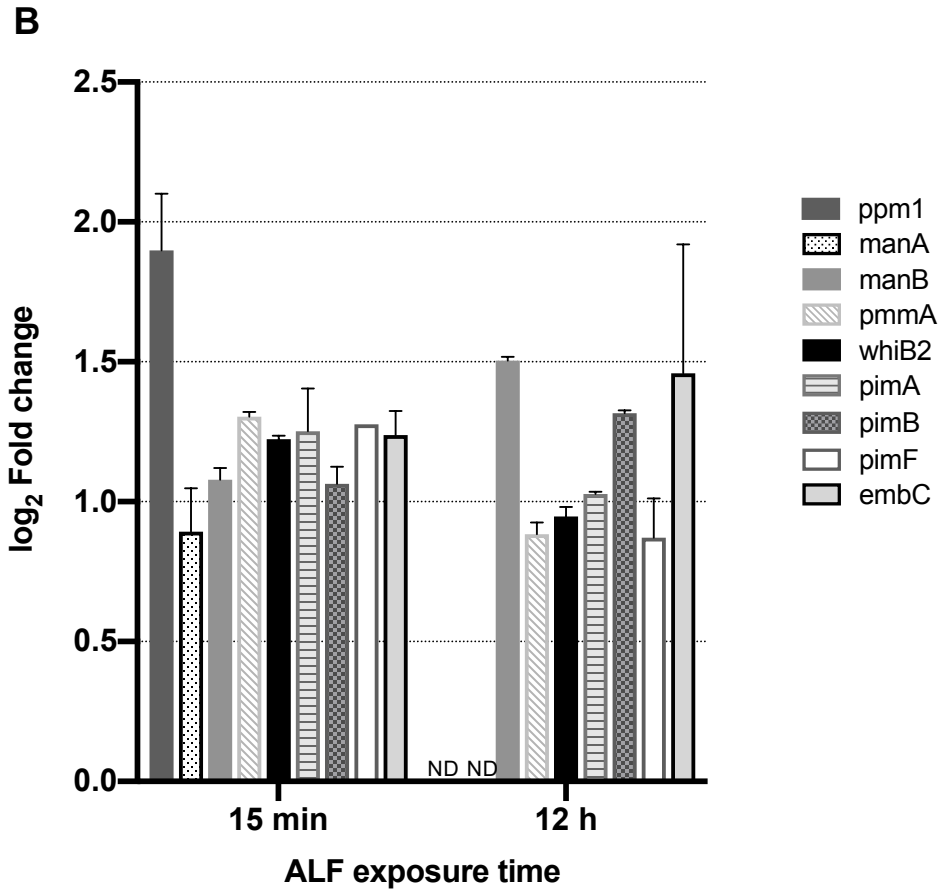

Fig 3

A. Lipid metabolism

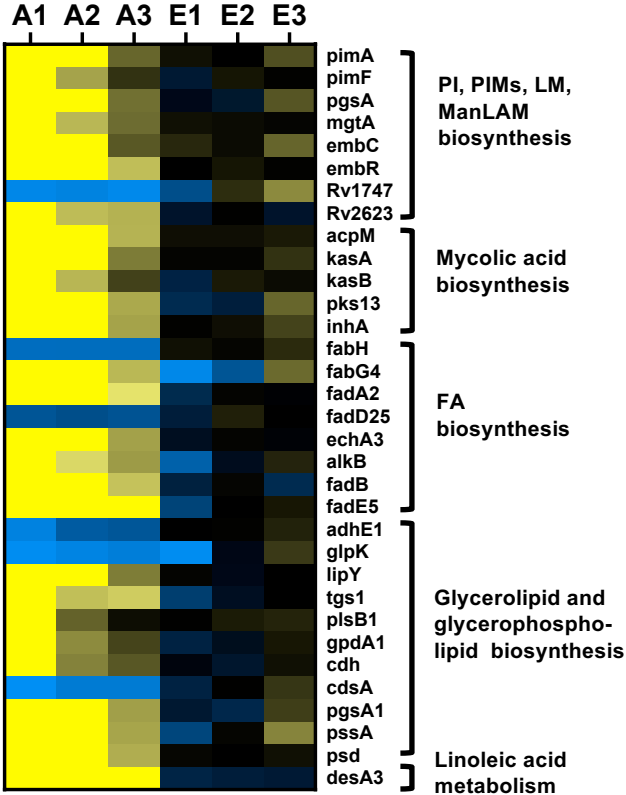

B. Carbohydrate metabolism

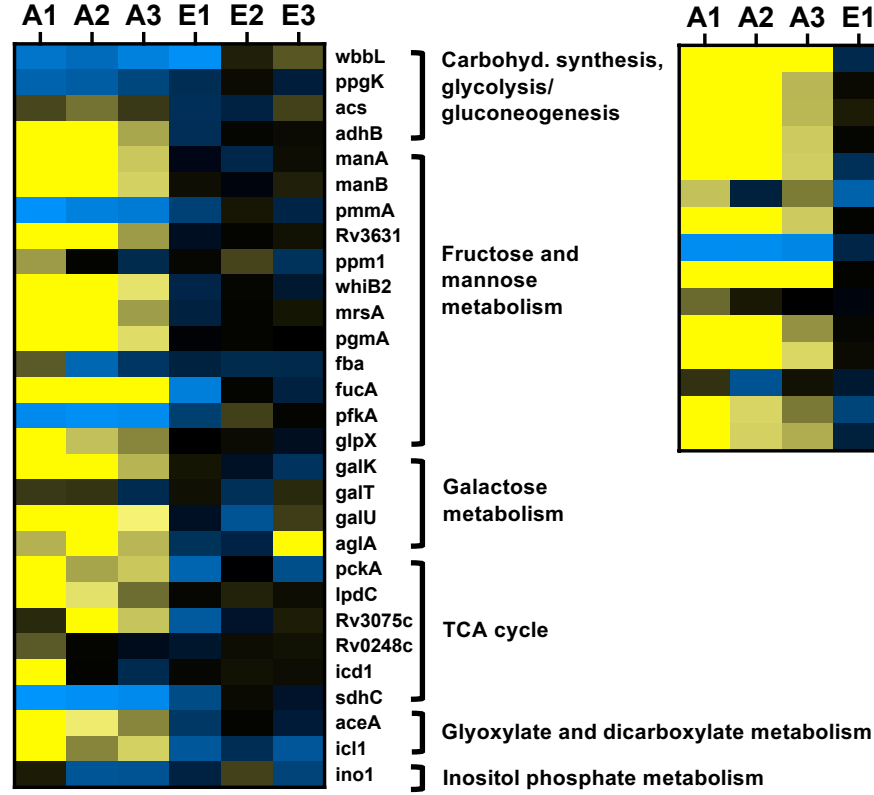

C. Others

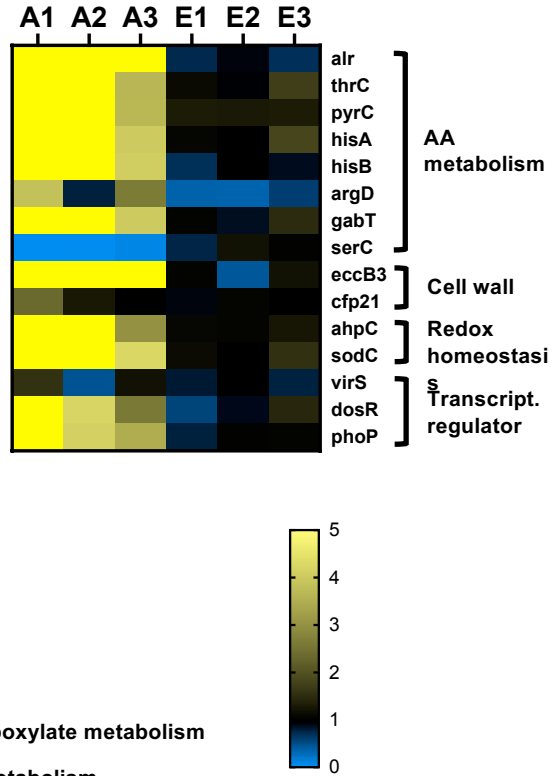

## 535 REFERENCES

- 536 1. WHO: **Global Tuberculosis Report 2020**. 2020.
- 537 2. Hogan AB, Jewell BL, Sherrard-Smith E, Vesga JF, Watson OJ, Whittaker C, Hamlet A,  
538 Smith JA, Winskill P, Verity R *et al*: **Potential impact of the COVID-19 pandemic on**  
539 **HIV, tuberculosis, and malaria in low-income and middle-income countries: a**  
540 **modelling study**. *Lancet Glob Health* 2020, **8**(9):e1132-e1141.
- 541 3. Cilloni L, Fu H, Vesga JF, Dowdy D, Pretorius C, Ahmedov S, Nair SA, Mosneaga A,  
542 Masini E, Sahu S *et al*: **The potential impact of the COVID-19 pandemic on the**  
543 **tuberculosis epidemic a modelling analysis**. *EClinicalMedicine* 2020, **28**:100603.
- 544 4. dos Santos FL, Souza LLL, Bruce ATI, Crispim JD, Arroyo LH, Ramos ACV, Berra TZ,  
545 Alves YM, Scholze AR, da Costa FBP *et al*: **Patients' perceptions regarding multidrug-**  
546 **resistant tuberculosis and barriers to seeking care in a priority city in Brazil during**  
547 **COVID-19 pandemic: A qualitative study**. *Plos One* 2021, **16**(4).
- 548 5. Marwah V, Peter DK, Ajai Kumar T, Bhati G, Kumar A: **Multidrug-resistant**  
549 **tuberculosis in COVID-19: Double trouble**. *Med J Armed Forces India* 2021, **77**:S479-  
550 S482.
- 551 6. Tiberi S, Vjecha MJ, Zumla A, Galvin J, Migliori GB, Zumla A: **Accelerating**  
552 **development of new shorter TB treatment regimens in anticipation of a resurgence of**  
553 **multi-drug resistant TB due to the COVID-19 pandemic**. *Int J Infect Dis* 2021.
- 554 7. Kalscheuer R, Palacios A, Anso I, Cifuentes J, Anguita J, Jacobs WR, Jr., Guerin ME,  
555 Prados-Rosales R: **The Mycobacterium tuberculosis capsule: a cell structure with key**  
556 **implications in pathogenesis**. *Biochem J* 2019, **476**(14):1995-2016.
- 557 8. Garcia-Vilanova A, Chan J, Torrelles JB: **Underestimated Manipulative Roles of**  
558 **Mycobacterium tuberculosis Cell Envelope Glycolipids During Infection**. *Front*  
559 *Immunol* 2019, **10**:2909.
- 560 9. Gago G, Diacovich L, Gramajo H: **Lipid metabolism and its implication in**  
561 **mycobacteria-host interaction**. *Curr Opin Microbiol* 2018, **41**:36-42.
- 562 10. Dulberger CL, Rubin EJ, Boutte CC: **The mycobacterial cell envelope - a moving target**.  
563 *Nat Rev Microbiol* 2020, **18**(1):47-59.
- 564 11. Vincent AT, Nyongesa S, Morneau I, Reed MB, Tocheva EI, Veyrier FJ: **The**  
565 **Mycobacterial Cell Envelope: A Relict From the Past or the Result of Recent**  
566 **Evolution?** *Front Microbiol* 2018, **9**:2341.
- 567 12. Chiaradia L, Lefebvre C, Parra J, Marcoux J, Burlet-Schiltz O, Etienne G, Tropis M, Daffe  
568 M: **Dissecting the mycobacterial cell envelope and defining the composition of the**  
569 **native mycomembrane**. *Sci Rep* 2017, **7**(1):12807.
- 570 13. Nicod LP: **Pulmonary defence mechanisms**. *Respiration* 1999, **66**:2-11.
- 571 14. Hiemstra PS, Bals R: **Series introduction: Innate host defense of the respiratory**  
572 **epithelium**. *J Leukoc Biol* 2004, **75**(1):3-4.
- 573 15. Williams MC: **Alveolar type I cells: molecular phenotype and development**. *Annu Rev*  
574 *Physiol* 2003, **65**:669-695.
- 575 16. Mason RJ: **Biology of alveolar type II cells**. *Respirology* 2006, **11 Suppl**:S12-S15.
- 576 17. Torrelles JB, Schlesinger LS: **Integrating Lung Physiology, Immunology, and**  
577 **Tuberculosis**. *Trends Microbiol* 2017, **25**(8):688-697.
- 578 18. Liu CH, Liu H, Ge B: **Innate immunity in tuberculosis: host defense vs pathogen**  
579 **evasion**. *Cell Mol Immunol* 2017, **14**(12):963-975.

- 580 19. Arcos J, Sasindran SJ, Fujiwara N, Turner J, Schlesinger LS, Torrelles JB: **Human lung**  
581 **hydrolases delineate Mycobacterium tuberculosis-macrophage interactions and the**  
582 **capacity to control infection.** *J Immunol* 2011, **187**(1):372-381.
- 583 20. Arcos J, Sasindran SJ, Moliva JI, Scordo JM, Sidiki S, Guo H, Venigalla P, Kelley HV,  
584 Lin G, Diangelo L *et al*: **Mycobacterium tuberculosis cell wall released fragments by**  
585 **the action of the human lung mucosa modulate macrophages to control infection in**  
586 **an IL-10-dependent manner.** *Mucosal Immunol* 2017, **10**(5):1248-1258.
- 587 21. Arcos J, Diangelo LE, Scordo JM, Sasindran SJ, Moliva JI, Turner J, Torrelles JB: **Lung**  
588 **Mucosa Lining Fluid Modification of Mycobacterium tuberculosis to Reprogram**  
589 **Human Neutrophil Killing Mechanisms.** *J Infect Dis* 2015, **212**(6):948-958.
- 590 22. Moliva JI, Duncan MA, Olmo-Fontanez A, Akhter A, Arnett E, Scordo JM, Ault R,  
591 Sasindran SJ, Azad AK, Montoya MJ *et al*: **The Lung Mucosa Environment in the**  
592 **Elderly Increases Host Susceptibility to Mycobacterium tuberculosis Infection.** *J*  
593 *Infect Dis* 2019, **220**(3):514-523.
- 594 23. Scordo JM, Arcos J, Kelley HV, Diangelo L, Sasindran SJ, Youngmin E, Wewers MD,  
595 Wang SH, Balada-Llasat JM, Torrelles JB: **Mycobacterium tuberculosis Cell Wall**  
596 **Fragments Released upon Bacterial Contact with the Human Lung Mucosa Alter the**  
597 **Neutrophil Response to Infection.** *Front Immunol* 2017, **8**:307.
- 598 24. Moliva JI, Rajaram MV, Sidiki S, Sasindran SJ, Guirado E, Pan XJ, Wang SH, Ross P, Jr.,  
599 Lafuse WP, Schlesinger LS *et al*: **Molecular composition of the alveolar lining fluid in**  
600 **the aging lung.** *Age (Dordr)* 2014, **36**(3):9633.
- 601 25. Olmo-Fontán AM, Scordo JM, Garcia-Vilanova A, Maselli DJ, Peters JI, Restrepo BI,  
602 Clemens DL, Turner J, Schlesinger LS, Torrelles JB: **Human alveolar lining fluid from**  
603 **the elderly promotes *Mycobacterium tuberculosis* growth in alveolar**  
604 **epithelial cells and bacterial translocation into the cytosol.** *bioRxiv*  
605 2021:2021.2005.2012.443884.
- 606 26. Arcos J, Sasindran SJ, Fujiwara N, Turner J, Schlesinger LS, Torrelles JB: **Human Lung**  
607 **Hydrolases Delineate Mycobacterium tuberculosis-Macrophage Interactions and the**  
608 **Capacity to Control Infection.** *J Immunol* 2011, **187**(1):372-381.
- 609 27. Scordo JM, Olmo-Fontanez AM, Kelley HV, Sidiki S, Arcos J, Akhter A, Wewers MD,  
610 Torrelles JB: **The human lung mucosa drives differential Mycobacterium tuberculosis**  
611 **infection outcome in the alveolar epithelium.** *Mucosal Immunol* 2019, **12**(3):795-804.
- 612 28. Livak KJ, Schmittgen TD: **Analysis of relative gene expression data using real-time**  
613 **quantitative PCR and the 2(T)(-Delta Delta C) method.** *Methods* 2001, **25**(4):402-408.
- 614 29. You FM, Huo N, Gu YQ, Luo MC, Ma Y, Hane D, Lazo GR, Dvorak J, Anderson OD:  
615 **BatchPrimer3: a high throughput web application for PCR and sequencing primer**  
616 **design.** *BMC Bioinformatics* 2008, **9**:253.
- 617 30. Cole ST, Brosch R, Parkhill J, Garnier T, Churcher C, Harris D, Gordon SV, Eiglmeier K,  
618 Gas S, Barry CE, 3rd *et al*: **Deciphering the biology of Mycobacterium tuberculosis**  
619 **from the complete genome sequence.** *Nature* 1998, **393**(6685):537-544.
- 620 31. Camus JC, Pryor MJ, Medigue C, Cole ST: **Re-annotation of the genome sequence of**  
621 **Mycobacterium tuberculosis H37Rv.** *Microbiology (Reading)* 2002, **148**(Pt 10):2967-  
622 2973.
- 623 32. Lew JM, Kapopoulou A, Jones LM, Cole ST: **TubercuList--10 years after.** *Tuberculosis*  
624 *(Edinb)* 2011, **91**(1):1-7.

- 625 33. Keiser TL, Azad AK, Guirado E, Bonacci R, Schlesinger LS: **Comparative**  
626 **transcriptional study of the putative mannose donor biosynthesis genes in virulent**  
627 **Mycobacterium tuberculosis and attenuated Mycobacterium bovis BCG strains.**  
628 *Infect Immun* 2011, **79**(11):4668-4673.
- 629 34. Guirado E, Mbawuiké U, Keiser TL, Arcos J, Azad AK, Wang SH, Schlesinger LS:  
630 **Characterization of host and microbial determinants in individuals with latent**  
631 **tuberculosis infection using a human granuloma model.** *mBio* 2015, **6**(1):e02537-  
632 02514.
- 633 35. Papavinasasundaram KG, Chan B, Chung JH, Colston MJ, Davis EO, Av-Gay Y: **Deletion**  
634 **of the Mycobacterium tuberculosis pknH gene confers a higher bacillary load during**  
635 **the chronic phase of infection in BALB/c mice.** *J Bacteriol* 2005, **187**(16):5751-5760.
- 636 36. Rana AK, Singh A, Gurucha SS, Cox LR, Bhatt A, Besra GS: **Ppm1-encoded polyprenyl**  
637 **monophosphomannose synthase activity is essential for lipoglycan synthesis and**  
638 **survival in mycobacteria.** *Plos One* 2012, **7**(10):e48211.
- 639 37. Gurucha SS, Baulard AR, Kremer L, Loch C, Moody DB, Muhlecker W, Costello CE,  
640 Crick DC, Brennan PJ, Besra GS: **Ppm1, a novel polyprenol monophosphomannose**  
641 **synthase from Mycobacterium tuberculosis.** *Biochem J* 2002, **365**(Pt 2):441-450.
- 642 38. Lv X, Ma CY, Yan ZF, Deng R, Ai XF, Su T, Xiang XH, Li W: **The Mycobacterium**  
643 **tuberculosis protein Rv2387 is involved in cell wall remodeling and susceptibility to**  
644 **acidic conditions.** *Biochem Bioph Res Co* 2018, **503**(2):625-630.
- 645 39. Stokas H, Rhodes HL, Purdy GE: **Modulation of the M. tuberculosis cell envelope**  
646 **between replicating and non-replicating persistent bacteria.** *Tuberculosis* 2020, **125**.
- 647 40. Howard NC, Marin ND, Ahmed M, Rosa BA, Martin J, Bambouskova M, Sergushichev  
648 A, Loginicheva E, Kurepina N, Rangel-Moreno J *et al*: **Mycobacterium tuberculosis**  
649 **carrying a rifampicin drug resistance mutation reprograms macrophage metabolism**  
650 **through cell wall lipid changes.** *Nat Microbiol* 2018, **3**(10):1099-+.
- 651 41. Bacon J, Alderwick LJ, Allnutt JA, Gabasova E, Watson R, Hatch KA, Clark SO, Jeeves  
652 RE, Marriott A, Rayner E *et al*: **Non-Replicating Mycobacterium tuberculosis Elicits a**  
653 **Reduced Infectivity Profile with Corresponding Modifications to the Cell Wall and**  
654 **Extracellular Matrix.** *Plos One* 2014, **9**(2).
- 655 42. Chang DPS, Guan XL: **Metabolic Versatility of Mycobacterium tuberculosis during**  
656 **Infection and Dormancy.** *Metabolites* 2021, **11**(2).
- 657 43. Yang L, Sinha T, Carlson TK, Keiser TL, Torrelles JB, Schlesinger LS: **Changes in the**  
658 **major cell envelope components of Mycobacterium tuberculosis during in vitro**  
659 **growth.** *Glycobiology* 2013, **23**(8):926-934.
- 660 44. Spurgeon SL, Jones RC, Ramakrishnan R: **High throughput gene expression**  
661 **measurement with real time PCR in a microfluidic dynamic array.** *Plos One* 2008,  
662 **3**(2):e1662.
- 663 45. Rhee KY, de Carvalho LP, Bryk R, Ehrt S, Marrero J, Park SW, Schnappinger D,  
664 Venugopal A, Nathan C: **Central carbon metabolism in Mycobacterium tuberculosis:**  
665 **an unexpected frontier.** *Trends Microbiol* 2011, **19**(7):307-314.
- 666 46. Glass LN, Swapna G, Chavadi SS, Tufariello JM, Mi K, Drumm JE, Lam TT, Zhu G, Zhan  
667 C, Vilcheze C *et al*: **Mycobacterium tuberculosis universal stress protein Rv2623**  
668 **interacts with the putative ATP binding cassette (ABC) transporter Rv1747 to**  
669 **regulate mycobacterial growth.** *PLoS Pathog* 2017, **13**(7):e1006515.



- 670 47. Phong WY, Lin W, Rao SP, Dick T, Alonso S, Pethe K: **Characterization of**  
671 **phosphofructokinase activity in Mycobacterium tuberculosis reveals that a functional**  
672 **glycolytic carbon flow is necessary to limit the accumulation of toxic metabolic**  
673 **intermediates under hypoxia.** *Plos One* 2013, **8**(2):e56037.
- 674 48. Konyarikova Z, Savkova K, Kozmon S, Mikusova K: **Biosynthesis of Galactan in**  
675 **Mycobacterium tuberculosis as a Viable TB Drug Target?** *Antibiotics (Basel)* 2020,  
676 **9**(1).
- 677 49. Hartman T, Weinrick B, Vilcheze C, Berney M, Tufariello J, Cook GM, Jacobs WR, Jr.:  
678 **Succinate dehydrogenase is the regulator of respiration in Mycobacterium**  
679 **tuberculosis.** *PLoS Pathog* 2014, **10**(11):e1004510.
- 680 50. Movahedzadeh F, Smith DA, Norman RA, Dinadayala P, Murray-Rust J, Russell DG,  
681 Kendall SL, Rison SC, McAlister MS, Bancroft GJ *et al*: **The Mycobacterium**  
682 **tuberculosis ino1 gene is essential for growth and virulence.** *Mol Microbiol* 2004,  
683 **51**(4):1003-1014.
- 684 51. Haufroid M, Wouters J: **Targeting the Serine Pathway: A Promising Approach against**  
685 **Tuberculosis?** *Pharmaceuticals (Basel)* 2019, **12**(2).
- 686 52. Famelis N, Rivera-Calzada A, Degliesposti G, Wingender M, Mietrach N, Skehel JM,  
687 Fernandez-Leiro R, Bottcher B, Schlosser A, Llorca O *et al*: **Architecture of the**  
688 **mycobacterial type VII secretion system.** *Nature* 2019, **576**(7786):321-325.
- 689 53. Wang C, Chen Z, Fu R, Zhang Y, Chen L, Huang L, Li J, Shi C, Fan X: **A DNA vaccine**  
690 **expressing CFP21 and MPT64 fusion protein enhances BCG-induced protective**  
691 **immunity against Mycobacterium tuberculosis infection in mice.** *Med Microbiol*  
692 *Immunol* 2011, **200**(3):165-175.
- 693 54. Renier W, Bourdin A, Rubbo PA, Peries M, Dedieu L, Bendriss S, Kremer L, Canaan S,  
694 Terru D, Godreuil S *et al*: **B cells response directed against Cut4 and CFP21 lipolytic**  
695 **enzymes in active and latent tuberculosis infections.** *Plos One* 2018, **13**(4):e0196470.
- 696 55. Wong CF, Shin J, Subramanian Manimekalai MS, Saw WG, Yin Z, Bhushan S, Kumar A,  
697 Raganathan P, Gruber G: **AhpC of the mycobacterial antioxidant defense system and**  
698 **its interaction with its reducing partner Thioredoxin-C.** *Sci Rep* 2017, **7**(1):5159.
- 699 56. Liao D, Fan Q, Bao L: **The role of superoxide dismutase in the survival of**  
700 **Mycobacterium tuberculosis in macrophages.** *Jpn J Infect Dis* 2013, **66**(6):480-488.
- 701 57. Singh R, Singh A, Tyagi AK: **Deciphering the genes involved in pathogenesis of**  
702 **Mycobacterium tuberculosis.** *Tuberculosis (Edinb)* 2005, **85**(5-6):325-335.
- 703 58. Turner J, Torrelles JB: **Mannose-capped lipoarabinomannan in Mycobacterium**  
704 **tuberculosis pathogenesis.** *Pathog Dis* 2018, **76**(4).
- 705 59. Torrelles JB, Schlesinger LS: **Diversity in Mycobacterium tuberculosis mannoseylated**  
706 **cell wall determinants impacts adaptation to the host.** *Tuberculosis (Edinb)* 2010,  
707 **90**(2):84-93.
- 708 60. Fratti RA, Backer JM, Gruenberg J, Corvera S, Deretic V: **Role of phosphatidylinositol**  
709 **3-kinase and Rab5 effectors in phagosomal biogenesis and mycobacterial phagosome**  
710 **maturation arrest.** *J Cell Biol* 2001, **154**(3):631-644.
- 711 61. Rajni, Rao N, Meena LS: **Biosynthesis and Virulent Behavior of Lipids Produced by**  
712 **Mycobacterium tuberculosis: LAM and Cord Factor: An Overview.** *Biotechnol Res*  
713 *Int* 2011, **2011**:274693.
- 714 62. Kang PB, Azad AK, Torrelles JB, Kaufman TM, Beharka A, Tibesar E, DesJardin LE,  
715 Schlesinger LS: **The human macrophage mannose receptor directs Mycobacterium**

- 716        **tuberculosis lipoarabinomannan-mediated phagosome biogenesis.** *J Exp Med* 2005,  
717        **202(7):987-999.**
- 718    63.    Wietzerbin-Falszpan J, Das BC, Gros C, Petit JF, Lederer E: **The amino acids of the cell**  
719        **wall of Mycobacterium tuberculosis var. bovis, strain BCG. Presence of a poly(L-**  
720        **glutamic acid).** *Eur J Biochem* 1973, **32(3):525-532.**
- 721    64.    Alderwick LJ, Harrison J, Lloyd GS, Birch HL: **The Mycobacterial Cell Wall--**  
722        **Peptidoglycan and Arabinogalactan.** *Cold Spring Harb Perspect Med* 2015,  
723        **5(8):a021113.**
- 724    65.    Cava F, de Pedro MA, Lam H, Davis BM, Waldor MK: **Distinct pathways for**  
725        **modification of the bacterial cell wall by non-canonical D-amino acids.** *Embo J* 2011,  
726        **30(16):3442-3453.**
- 727    66.    Maitra A, Munshi T, Healy J, Martin LT, Vollmer W, Keep NH, Bhakta S: **Cell wall**  
728        **peptidoglycan in Mycobacterium tuberculosis: An Achilles' heel for the TB-causing**  
729        **pathogen.** *Fems Microbiol Rev* 2019, **43(5):548-575.**
- 730    67.    Garcia-Heredia A, Pohane AA, Melzer ES, Carr CR, Fiolek TJ, Rundell SR, Lim HC,  
731        Wagner JC, Morita YS, Swarts BM *et al*: **Peptidoglycan precursor synthesis along the**  
732        **sidewall of pole-growing mycobacteria.** *Elife* 2018, **7.**
- 733    68.    He Z, De Buck J: **Cell wall proteome analysis of Mycobacterium smegmatis strain**  
734        **MC2 155.** *BMC Microbiol* 2010, **10:121.**
- 735    69.    Mehra S, Foreman TW, Didier PJ, Ahsan MH, Hudock TA, Kisse R, Golden NA, Gautam  
736        US, Johnson AM, Alvarez X *et al*: **The DosR Regulon Modulates Adaptive Immunity**  
737        **and Is Essential for Mycobacterium tuberculosis Persistence.** *Am J Respir Crit Care*  
738        *Med* 2015, **191(10):1185-1196.**
- 739    70.    Ryndak M, Wang S, Smith I: **PhoP, a key player in Mycobacterium tuberculosis**  
740        **virulence.** *Trends Microbiol* 2008, **16(11):528-534.**
- 741    71.    Broset E, Martin C, Gonzalo-Asensio J: **Evolutionary landscape of the Mycobacterium**  
742        **tuberculosis complex from the viewpoint of PhoPR: implications for virulence**  
743        **regulation and application to vaccine development.** *mBio* 2015, **6(5):e01289-01215.**
- 744    72.    Singh A, Crossman DK, Mai D, Guidry L, Voskuil MI, Renfrow MB, Steyn AJ:  
745        **Mycobacterium tuberculosis WhiB3 maintains redox homeostasis by regulating**  
746        **virulence lipid anabolism to modulate macrophage response.** *PLoS Pathog* 2009,  
747        **5(8):e1000545.**
- 748    73.    Reed MB, Gagneux S, DeRiemer K, Small PM, Barry CE: **The W-Beijing lineage of**  
749        **Mycobacterium tuberculosis overproduces triglycerides and has the DosR dormancy**  
750        **regulon constitutively upregulated.** *Journal of Bacteriology* 2007, **189(7):2583-2589.**
- 751    74.    Shaku M, Ealand C, Kana BD: **Cell Surface Biosynthesis and Remodeling Pathways in**  
752        **Mycobacteria Reveal New Drug Targets.** *Front Cell Infect Microbiol* 2020, **10:603382.**
- 753    75.    Drumm JE, Mi K, Bilder P, Sun M, Lim J, Bielefeldt-Ohmann H, Basaraba R, So M, Zhu  
754        G, Tufariello JM *et al*: **Mycobacterium tuberculosis universal stress protein Rv2623**  
755        **regulates bacillary growth by ATP-Binding: requirement for establishing chronic**  
756        **persistent infection.** *PLoS Pathog* 2009, **5(5):e1000460.**
- 757    76.    Curry JM, Whalan R, Hunt DM, Gohil K, Strom M, Rickman L, Colston MJ, Smerdon SJ,  
758        Buxton RS: **An ABC transporter containing a forkhead-associated domain interacts**  
759        **with a serine-threonine protein kinase and is required for growth of Mycobacterium**  
760        **tuberculosis in mice.** *Infect Immun* 2005, **73(8):4471-4477.**



- 761 77. Allue-Guardia A, Garcia JJ, Torrelles JB: **Evolution of Drug-Resistant Mycobacterium**  
762 **tuberculosis Strains and Their Adaptation to the Human Lung Environment.** *Front*  
763 *Microbiol* 2021, **12**:612675.
- 764 78. Treumann A, Xidong F, McDonnell L, Derrick PJ, Ashcroft AE, Chatterjee D, Homans  
765 SW: **5-Methylthiopentose: a new substituent on lipoarabinomannan in**  
766 **Mycobacterium tuberculosis.** *J Mol Biol* 2002, **316**(1):89-100.
- 767 79. Turnbull WB, Shimizu KH, Chatterjee D, Homans SW, Treumann A: **Identification of**  
768 **the 5-methylthiopentosyl substituent in Mycobacterium tuberculosis**  
769 **lipoarabinomannan.** *Angew Chem Int Ed Engl* 2004, **43**(30):3918-3922.
- 770 80. Angala SK, McNeil MR, Shi L, Joe M, Pham H, Zuberogitia S, Nigou J, Boot CM,  
771 Lowary TL, Gilleron M *et al*: **Biosynthesis of the Methylthioxylose Capping Motif of**  
772 **Lipoarabinomannan in Mycobacterium tuberculosis.** *ACS Chem Biol* 2017, **12**(3):682-  
773 691.  
774
